# Supplementary material for: Key Components in eHealth Interventions Combining Self-Tracking and Persuasive eCoaching to Promote a Healthier Lifestyle: A Scoping Review
Source: PubMed Central journal article supplement (PMC5558041; doi:10.2196/jmir.7288), 2017-08-01
Supplement: jmir_v19i8e277_app2.pdf [file jmir_v19i8e277_app2.pdf]

Multimedia Appendix 2

**Table. Overview of persuasive eCoaching components.<sup>a</sup>**

| Persuasive eCoaching component | Principle citations                                                                                                                                                                          | Example                                                                                                                                                |
|--------------------------------|----------------------------------------------------------------------------------------------------------------------------------------------------------------------------------------------|--------------------------------------------------------------------------------------------------------------------------------------------------------|
| <b>Primary task support</b>    | Components that support the users in “the carrying out of the user’s primary task” [9].                                                                                                      |                                                                                                                                                        |
| Reduction                      | “A system that reduces complex behavior into simple tasks helps users perform the target behavior, and it may increase the benefit/cost ratio of a behavior” [9].                            | Setting incremental daily step goals to eventually reach the long term goal.                                                                           |
| Tunneling                      | “Using the system to guide users through a process of experience provides opportunities to persuade along the way” [9].                                                                      | Only when participants succeeded to reach the current daily step goal, they are provided with access to information on how to continue their progress. |
| Tailoring                      | “Information provided by the system will be more persuasive if it is tailored to the potential needs, interests, personality, usage context, or other factors relevant to a user group” [9]. | The layout of a mobile applications is adjusted based on user’s gender.                                                                                |
| Personalization                | “A system that offers personalized content or services has a greater capability to persuade” [9].                                                                                            | Based on a user’s weight loss, the dietary recommendations will be adjusted.                                                                           |
| Simulation                     | “Systems that provide simulations can persuade by enabling users to observe immediately the link between cause and effect” [9].                                                              | A graph is showing the successfully completed exercise tasks per day in relation to the increase in daily steps.                                       |
| Rehearsal                      | “A system providing means with which to rehearse a behavior can enable people to change their attitudes or behavior in the real                                                              | In a weight management intervention, video instructions are provided on how to cook a low-fat meal.                                                    |

|                                   |                                                                                                                                                          |                                                                                                                         |
|-----------------------------------|----------------------------------------------------------------------------------------------------------------------------------------------------------|-------------------------------------------------------------------------------------------------------------------------|
|                                   | world” [9].                                                                                                                                              |                                                                                                                         |
| <b>Dialogue support</b>           | Components “related to implementing computer-human dialogue support in a manner that helps users keep moving towards their goal or target behavior” [9]. |                                                                                                                         |
| Praise                            | “By offering praise, a system can make users more open to persuasion” [9].                                                                               | Participants receive a praise message when they reach their weekly weight-loss goal.                                    |
| Rewards                           | “Systems that reward target behaviors may have great persuasive powers” [9].                                                                             | Participants can collect coins when they completed an exercise and return them into discounts for fruit and vegetables. |
| Reminders                         | “If a system reminds users of their target behavior or usage of the system, the users will more likely achieve their goals” [9].                         | The system reminds the participant to upload their weekly accelerometer data into the system.                           |
| Suggestion                        | “System offering fitting suggestions will have greater persuasive powers” [9].                                                                           | A user receives a message suggesting to take the bicycle to work instead of the car.                                    |
| Similarity                        | “People are more readily persuaded through systems that remind them of themselves in some meaningful way” [9].                                           | The system sends out reminders at convenient moments in time for the user.                                              |
| Liking                            | “A system that is (visually) attractive for its users is likely to be more persuasive” [9].                                                              | The system provides a weekly funny fact struggles with physical activity behavior change.                               |
| Social role                       | “If a system adopts a social role, users will more likely use it for persuasive purposes” [9].                                                           | A virtual coach greets the person before they start the coaching session of a mobile application.                       |
| <b>System credibility support</b> | Components that support the design “to be more credible and thus more persuasive.” [9]                                                                   |                                                                                                                         |
| Trustworthiness                   | “A system is viewed as trustworthy will have                                                                                                             | A mobile applications, that collects personal                                                                           |

|                           |                                                                                                                                      |                                                                                                                           |
|---------------------------|--------------------------------------------------------------------------------------------------------------------------------------|---------------------------------------------------------------------------------------------------------------------------|
|                           | increased powers of persuasion” [9].                                                                                                 | health data by means of a wearable device, makes a promise that the data will not be shared with third parties.           |
| Expertise                 | “A system that is viewed as incorporating expertise will have increased powers of persuasion” [9].                                   | When the system provides suggestions for weight loss, it provides links to dietary protocols.                             |
| Surface credibility       | “People make initial assessments of the system credibility based on a firsthand inspection” [9].                                     | No or only limited commercial advertisements are provided within a mobile phone application.                              |
| Real-world feel           | “A system that highlights people or organization behind its content or services will have more credibility” [9].                     | Including contact information of the organization of development in a mobile intervention.                                |
| Authority                 | “A system that leverages roles of authority will have enhanced powers of persuasion” [9].                                            | Provision of information in a mobile application about development in collaboration with health care professionals.       |
| Third-party endorsement   | “Third-party endorsements, especially from well-known and respected sources, boost perceptions on system credibility” [9].           | This mobile application is approved as an eHealth intervention by the RVZ (The Council for Public Health and Health Care) |
| Verifiability             | “Credibility perceptions will be enhanced if a system makes it easy to verify the accuracy of site content via outside sources” [9]. | Links are provided to the original source of the content used in the mobile application                                   |
| <b>Social support</b>     | Components in the design that “motivates users by leveraging social influence” [9].                                                  |                                                                                                                           |
| Social support in general | The system motivates the user by leveraging social influence which cannot be placed under specific components                        | Users are able to share information about their jogging routes without knowing the goal behind it: obtaining              |

|                     |                                                                                                                                                        |                                                                                                                                                      |
|---------------------|--------------------------------------------------------------------------------------------------------------------------------------------------------|------------------------------------------------------------------------------------------------------------------------------------------------------|
|                     | such as social learning or social facilitation as the goal of the specific social support component is unknown.                                        | recognition, social learning or maybe just see that others are performing the behavior along with them (social facilitation).                        |
| Social learning     | “A person will be more motivated to perform a target behavior if (s)he can use a system to observe others performing the behavior” [9].                | A user presents the activities he/she performed which has led to obtainment of a physical activity goal.                                             |
| Social comparison   | “System users will have a greater motivation to perform the target behavior if they can compare their performance with the performance of others” [9]. | The average number of steps taken from a user with similar characteristics can be observed and compared with the user’s own average number of steps. |
| Normative influence | “A System can leverage normative influence or peer pressure to increase the likelihood that a person will adopt a target behavior” [9].                | Before and after pictures are presented of people who succeeded to lose weight.                                                                      |
| Social facilitation | “System users are more likely to perform target behavior if they discern via the system that others are performing the behavior along with them” [9].  | A blog can be posted on an online platform where people can find others with similar goals.                                                          |
| Cooperation         | “A system can motivate users to adopt a target attitude or behavior by leveraging human beings’ natural drive to co-operate” [9].                      | When 90% of a group reached their step goal that they, the whole group receives virtual rewards.                                                     |
| Competition         | “A system can motivate users to adopt a target attitude or behavior by leveraging human beings’ natural drive to compete” [9].                         | Users will be ranked within a group of users based on their steps taken to observe who has performed the most physical activity during a week.       |
| Recognition         | “By offering public recognition for an individual or group, a                                                                                          | Users can post their accomplishment and receive “likes” from                                                                                         |

|                      |                                                                                                                                                                                                             |                                                                                                                                               |
|----------------------|-------------------------------------------------------------------------------------------------------------------------------------------------------------------------------------------------------------|-----------------------------------------------------------------------------------------------------------------------------------------------|
|                      | system can increase the likelihood that a person/group will adopt a target behavior” [9].                                                                                                                   | other users.                                                                                                                                  |
| <b>Other</b>         |                                                                                                                                                                                                             |                                                                                                                                               |
| Goal-setting         | A system can motivate users to perform the target behavior by setting goals (both short and long term). It sets the focus and, by means of self-tracking data, users can objectively see how they progress. | By means of self-tracking data, a daily step goal will be set for the user with 10% increase of the average steps per day from the past week. |
| Educational coaching | A system can provide knowledge about the target behavior and causes and effects which could persuade the user in performing the target behavior.                                                            | A video explains why it is important for office workers to perform a few minutes of moderate physical activity per hour.                      |
| Feedback             | The system provides feedback which cannot be placed under specific components such as personalization, praise, or suggestions.                                                                              | A feedback message is send after participants upload self-tracking data into the system notifying that the data is received.                  |

<sup>a</sup> Principles are cited from the article by Oinas-Kukkonen and Harjumaa [9] with exception of the components social support in general, goal-setting, educational coaching and feedback. These four components are added for the purpose of this review study.
