# Supplementary material for: Key Components in eHealth Interventions Combining Self-Tracking and Persuasive eCoaching to Promote a Healthier Lifestyle: A Scoping Review
Source: PubMed Central journal article supplement (PMC5558041; doi:10.2196/jmir.7288), 2017-08-01
Supplement: jmir_v19i8e277_app4.pdf [file jmir_v19i8e277_app4.pdf]

Multimedia Appendix 4.

Table. Key components and their specific design for effects on health outcomes, usability, and/or adherence.

| Key component               | Design of component                                                | Pattern observed for effect on health outcomes (H), usability (U), and/or adherence (A) | Based on results from study..                                          |
|-----------------------------|--------------------------------------------------------------------|-----------------------------------------------------------------------------------------|------------------------------------------------------------------------|
| <b>Persuasive eCoaching</b> |                                                                    |                                                                                         |                                                                        |
| Reduction                   | 1. Include reduction                                               | H + U                                                                                   | H: 32, 39, 41, 49, 51, 60, 63<br>U: 36, 46, 50, 58, 62                 |
|                             | 2. Setting short term goals                                        | H + U                                                                                   | H: 32, 39, 41, 51, 60, 63<br>U: 46, 58                                 |
|                             | 3. Ability to enable or disable observation of trends and patterns | U                                                                                       | U: 46, 47, 50, 59                                                      |
|                             | 4. Provide means to perform behavior                               | U                                                                                       | U: 58, 62                                                              |
| Personalization             | 1. Include personalization                                         | H + U                                                                                   | H: 32, 37, 39, 41, 45, 48, 49, 51, 53, 57, 60, 61<br>U: 34, 36, 50, 62 |
|                             | 2. Personalization of goals                                        | H + U                                                                                   | H: 32, 39, 51, 60<br>U: 34, 46, 47, 50, 56-59                          |
|                             | 3. Personalization of content                                      | U + A                                                                                   | U: 34, 47, 57, 58<br>A: 46, 59, 62                                     |
|                             | 4. Personalization of multiple components                          | H                                                                                       | H: 32, 39, 41, 51, 60                                                  |
|                             | 5. Ability to enable or disable observation of trends and patterns | U                                                                                       | U: 46, 47, 50, 59                                                      |
|                             | 6. Ability to adjust technical features                            | U                                                                                       | U: 42, 47,                                                             |

|                     |                                                                            |       |                                                                        |
|---------------------|----------------------------------------------------------------------------|-------|------------------------------------------------------------------------|
|                     |                                                                            |       | 50, 55, 57, 59, 62                                                     |
| Praise              | 1. Include praise                                                          | H + U | H:32, 39, 51, 60<br>U: 42, 47, 55, 59, 62                              |
|                     | 2. Account for gender differences                                          | U     | U: 59                                                                  |
| Rewards             | Include rewards (monetary or non-monetary incentives)                      | U     | U: 36, 50, 62                                                          |
| Reminders           | 1. Include reminders                                                       | H + U | H: 32, 37, 44, 51, 53, 57, 60<br>U: 35, 42, 47, 50                     |
|                     | 2. Reminders asking to enter/upload data into the technology               | H + U | H: 51, 60<br>U: 47                                                     |
|                     | 3. Timing and frequency of importance                                      | U     | U: 42, 47, 50, 57, 59, 62                                              |
| Similarity          | Connect with or complement existing behavior                               | U     | U: 46, 49, 59                                                          |
| Simulation          | Include simulation to observe progress                                     | H + U | H: 37, 39, 48, 51, 53, 57, 61, 63<br>U: 32, 34, 35, 47, 50, 55, 59, 62 |
| Suggestion          | Include suggestion                                                         | H     | H: 32, 37, 39, 45, 48, 49, 51, 53, 57, 60, 63                          |
| Social role         | The technology should act as a social being to some extent                 | U     | U: 33, 35, 62                                                          |
| Trustworthiness     | 1. Trustworthy content                                                     | U     | U: 58, 59, 62                                                          |
|                     | 2. Control over data sharing                                               | U     | U: 46, 50                                                              |
|                     | 3. Password protection can be enabled or disabled                          | U     | U: 50, 59                                                              |
| Tunneling           | Provide feedback based on how well the user changed behavior               | H     | H: 41, 45, 63                                                          |
| Surface credibility | Provide a technology that is not noticed as an automated technology        | U     | U: 35, 57                                                              |
| Social support      | 1. Be careful with inclusion of social support (as it is rather negatively | U     | U: 34, 50, 59, 62                                                      |

|                      |                                                                                                                        |       |                                               |
|----------------------|------------------------------------------------------------------------------------------------------------------------|-------|-----------------------------------------------|
|                      | perceived among participants)                                                                                          |       |                                               |
|                      | 2. To increase acceptability: provide social support via peers, friends or family                                      | U     | U: 50, 59, 62                                 |
|                      | 3. To increase acceptability: Do not use social media where everybody can observe personal results                     | U     | U: 59, 62                                     |
| Cooperation          | To increase acceptability of social support: incorporate cooperation among participants to work towards a similar goal | U     | U: 46, 50, 59                                 |
| Competition          | To increase acceptability of social support: option to compete with peers or not                                       | U     | U: 59, 62                                     |
| Educational coaching | Short videos which do not require large amounts of internet/mobile data                                                | U     | U: 38, 59, 62                                 |
|                      | Account for known knowledge by participant                                                                             | U     | U: 47, 58                                     |
| Goal setting         | 1. Include goal-setting                                                                                                | H     | H: 32, 37, 39, 41, 49, 51, 53, 60, 61, 63     |
|                      | 2. Use self-tracking data as input for automatic goal-setting                                                          | H     | H: 32, 51, 60                                 |
|                      | 3. Personalization of goals                                                                                            | H + U | H: 32, 39, 51, 60<br>U: 34, 46, 47, 50, 56-59 |
|                      | 4. Monitor progress towards goals                                                                                      | U     | U: 33-35, 47, 50, 55, 59, 62                  |
|                      | 5. Setting short term goals                                                                                            | U     | U: 46, 58                                     |
| Feedback             | 1. Provide immediate, not paternalistic, short, personalized, and positive feedback                                    | U     | U: 34-36, 39, 47, 55, 57-59, 62               |
|                      | 2. Timing and frequency of feedback is important                                                                       | U     | U: 42, 47, 50, 57, 59, 62                     |
| <b>Self-tracking</b> |                                                                                                                        |       |                                               |
| Self-tracking        | Incorporate self-tracking to increase awareness                                                                        | U     | U: 36, 46, 47, 49, 62                         |
| Device               | Accelerometer                                                                                                          | H     | H: 37, 41, 45, 49, 53, 57                     |

|                                                       |                                                                                                            |       |                                                                                            |
|-------------------------------------------------------|------------------------------------------------------------------------------------------------------------|-------|--------------------------------------------------------------------------------------------|
| Measurement                                           | Should capture all relevant behavioral data (e.g. besides only steps for measurement of physical activity) | U     | U: 33, 55, 62                                                                              |
| The effort by the participant                         | 1. More effort does not seem to be a barrier                                                               | H + U | H: 32, 48, 51, 60<br>U: 50                                                                 |
|                                                       | 2. Automatically tracking preferred                                                                        | U     | U: 46, 59, 62                                                                              |
| Summary                                               | 1. Visualization of self-tracking data is perceived appealing                                              | U     | U: 36, 55, 56                                                                              |
|                                                       | 2. Observe progress                                                                                        | U     | U: 33-35, 47, 50, 55, 59, 62                                                               |
|                                                       | 3. Enable personalization of layout of the displayed summary data                                          | U     | U: 55, 62                                                                                  |
|                                                       | 4. Ability to enable or disable observation of trends and patterns                                         | U     | U: 46, 47, 50, 59                                                                          |
| Validity                                              | Valid and reliable measurements perceived important                                                        | H + U | H: 32, 39, 45<br>U: 46, 56, 59                                                             |
| <b>Other intervention components</b>                  |                                                                                                            |       |                                                                                            |
| Applying results from other research                  | Use results from other research to inform the design                                                       | H     | H: 32, 39, 49, 51, 60, 61, 63                                                              |
| Medium                                                | 1. Deliver the intervention via a smartphone                                                               | U     | U: 46, 50, 55, 58, 59, 62                                                                  |
|                                                       | 2. Able to use the intervention 24/7                                                                       | U     | U: 36, 47                                                                                  |
| Design testing                                        | Problems with usages of the intervention should be eliminated during the testing phase                     | A     | A: 36, 62                                                                                  |
| Implementation                                        | Provision of face-to-face instructions on how to use the intervention                                      | H + U | H: 32, 37, 39, 49, 51, 57, 61, 63<br>U: 42, 56                                             |
| Integration of self-tracking and persuasive eCoaching | Include integration of self-tracking and persuasive eCoaching                                              | H + U | H: 32, 37, 39, 41, 45, 48, 49, 51, 53, 61<br>U: 32, 34-36, 39, 42, 46, 47, 51, 54, 56, 59, |

|                  |                                                                     |   |                               |
|------------------|---------------------------------------------------------------------|---|-------------------------------|
|                  |                                                                     |   | 62                            |
| Blended coaching | Use automatic eHealth intervention to supplement in-person sessions | U | U: 39, 46, 47, 54, 55, 58, 59 |
